# Supplementary material for: A Severe Acute Pancreatitis Mouse Model Transited from Mild Symptoms Induced by a “Two-Hit” Strategy with L-Arginine
Source: MDPI journal article supplement (doi:10.3390/life12010126), 2022-01-16
Supplement: s1 [file s1]

The Supplementary Materials for

**A Severe Acute Pancreatitis Mouse Model Transited  
from Mild Symptoms Induced by a “Two-Hit”  
Strategy with L-Arginine**

Jing Yang, Xujiao Tang, Qingqing Wu, Panpan Ren and Yishu Yan

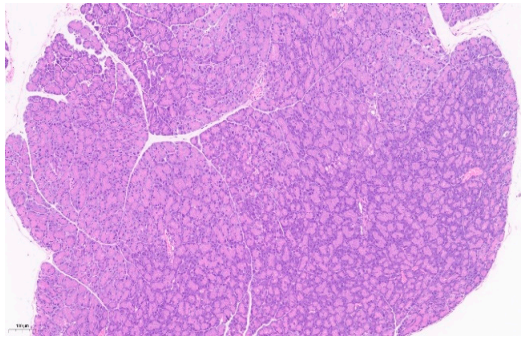

**Control**

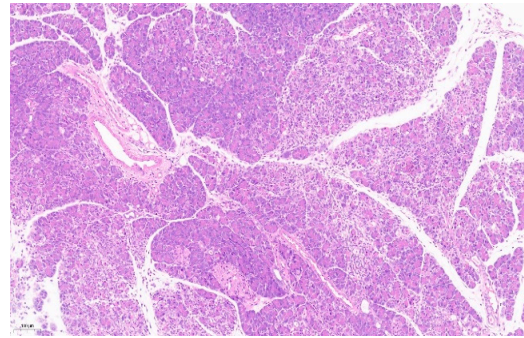

**“One-hit” 24 h**

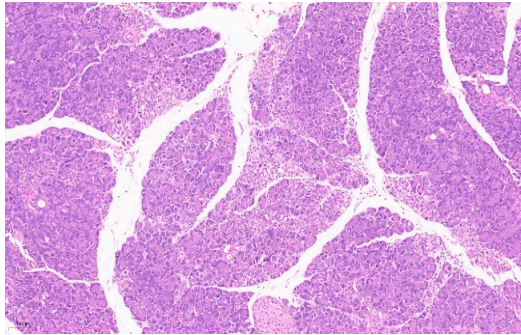

**“One-hit” 72 h**

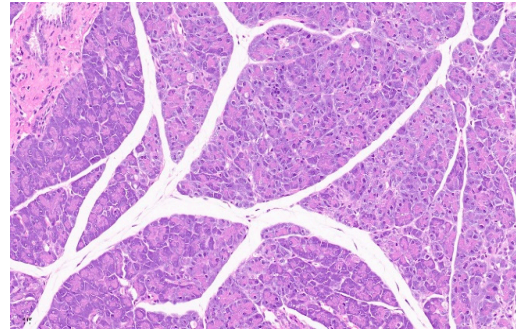

**“One-hit” 96 h**

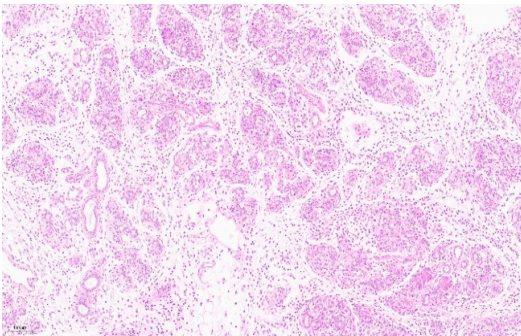

**“Two hit” 24 h**

**Figure S1.** The H&E images of the pancreatic tissue after injury.

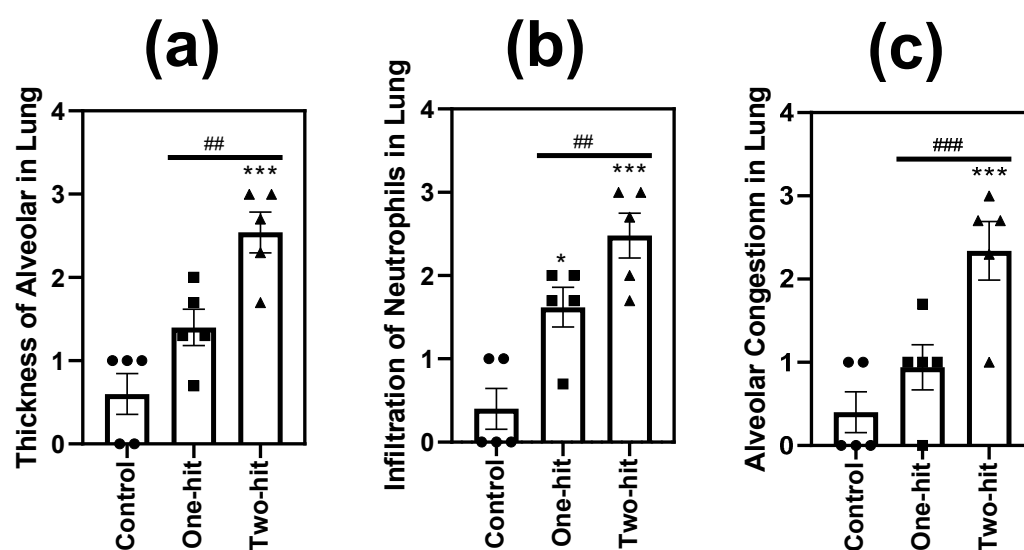

**Figure S2.** The evaluation criteria of the lung tissue.

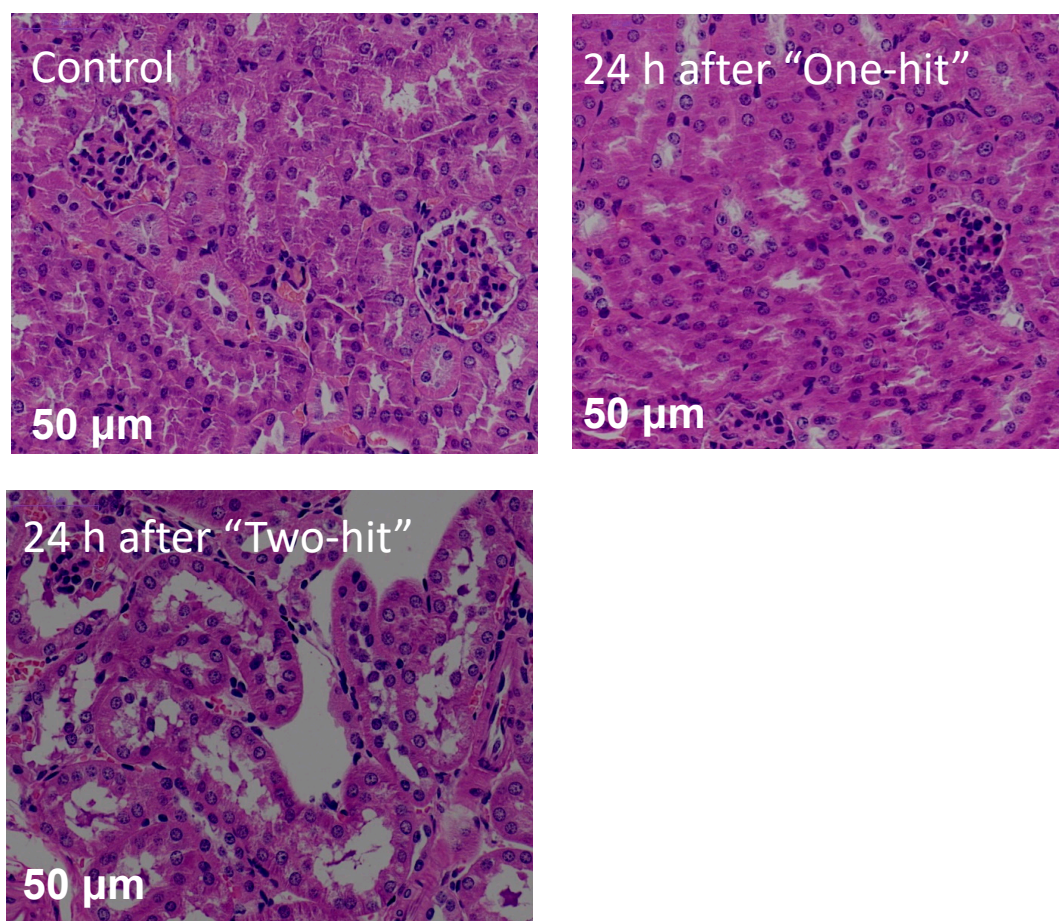

**Figure S3.** The H&E images of the kidney tissue after injury.
